# Supplementary material for: Efficient identification of neoantigen-specific T-cell responses in advanced human ovarian cancer
Source: J Immunother Cancer. 2019 Jun 20;7:156. doi: 10.1186/s40425-019-0629-6 (PMC6587259; doi:10.1186/s40425-019-0629-6)
Supplement: Supplementary file 14 — Table S3. Somatic mutation burdens and predicted neoantigen load in the 20 patients. The predicted neoantigens are classified as expressed or non-expressed based on the mutant allele’s expression level in RNAseq data (see Method section). (XLSX 10 kb) [file 40425_2019_629_MOESM14_ESM.xlsx]

## Sheet: Table S3
Table S3: Somatic mutation burdens and predicted neoantigen load in the 20 patients
Patient	Non synonymous Mutations	Mutations with predicted neoantigen	Expressed					Non-expressed
			All	Class I	Class II	Class I&II		All	Class I	Class II	Class I&II
Pt #01	54	21	12	1	9	2		9	2	7	0
Pt #02	52	6	3	1	2	0		3	1	2	0
Pt #03	188	75	35	3	25	7		40	2	31	7
Pt #04	97	44	22	5	10	7		22	4	11	7
Pt #05	45	10	7	0	6	1		3	1	2	0
Pt #06	70	22	12	2	5	5		10	4	2	4
Pt #07	59	23	6	3	0	3		17	7	7	3
Pt #08	49	8	7	1	6	0		1	1	0	0
Pt #09	27	10	3	2	1	0		7	3	0	4
Pt #10	99	36	13	2	9	2		23	3	10	10
Pt #11	84	18	11	4	3	4		7	2	2	3
Pt #12	31	10	0	0	0	0		10	4	2	4
Pt #13	64	25	13	2	5	6		12	1	5	6
Pt #14	9	5	3	0	0	3		2	0	2	0
Pt #15	84	27	13	5	4	4		14	6	4	4
Pt #16	51	14	7	0	3	4		7	2	4	1
Pt #17	80	30	14	3	11	0		16	4	9	3
Pt #18	76	20	5	4	1	0		15	5	6	4
Pt #19	132	41	22	5	14	3		19	4	13	2
Pt #20	17	4	1	0	0	1		3	1	1	1
Total Counts	1368	449	209	43	114	52	0	240	57	120	63
The predicted neoantigens are classified as expressed or non-expressed based on the mutant allele’s expression level in RNA-seq data (see Method section).
